# Supplementary material for: Doxorubicin Loading into Milk and Mesenchymal Stem Cells’ Extracellular Vesicles as Drug Delivery Vehicles
Source: MDPI journal article supplement (doi:10.3390/pharmaceutics15030718), 2023-02-21
Supplement: s1 [file s1]

## Supplementary information

### Supplementary Figure S1

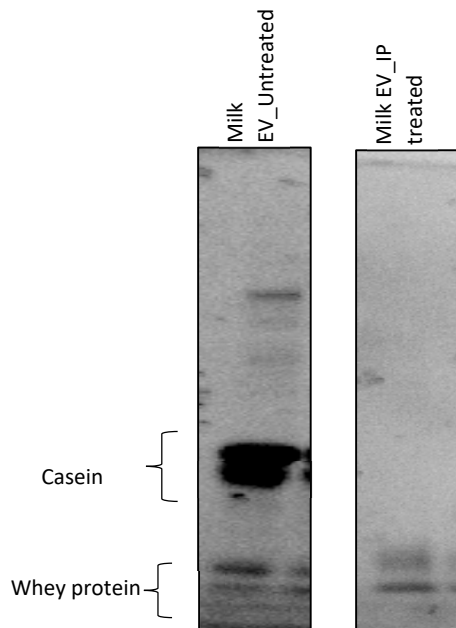

**Supp Figure S1:** Total protein separation by polyacrylamide gel electrophoresis indicates efficient removal of casein proteins in IP treated milk samples compared to untreated milk samples.

### Supplementary Figure S2

20 µg Dox

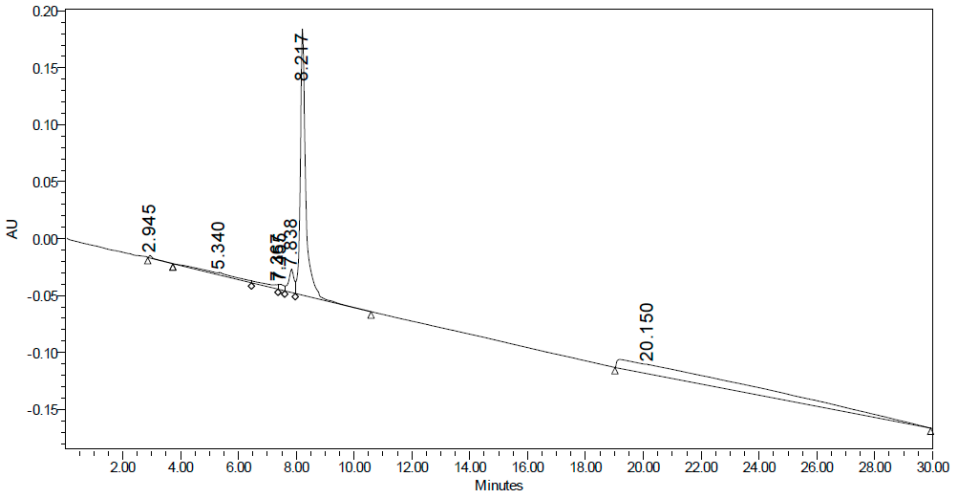

10 µg Dox

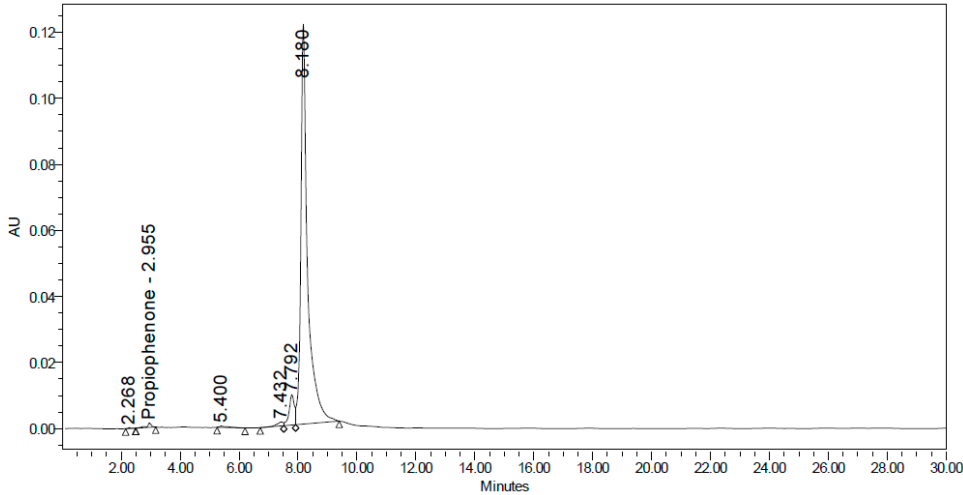

5 µg Dox

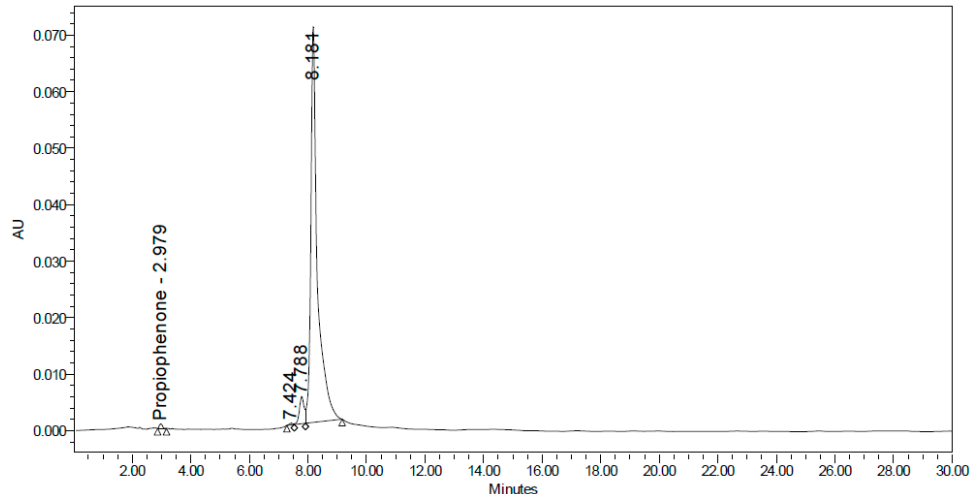

**2.5 µg Dox**

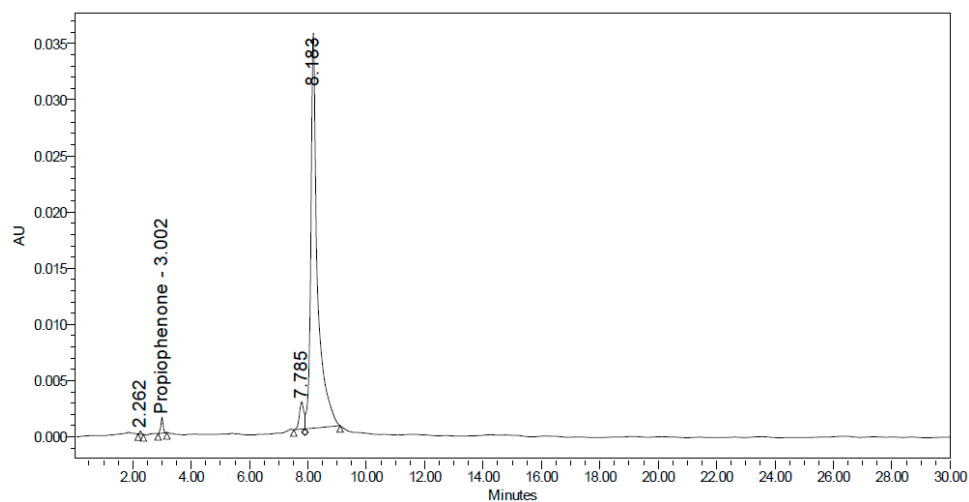

**Dox Standard  
curve**

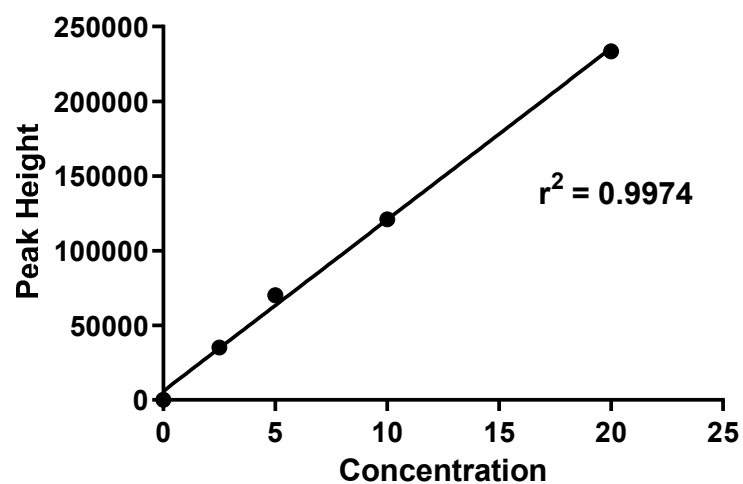

**Supp Figure S2a:** Serially diluted Dox samples were analysed by HPLC to obtain the standard curve and unknown concentration of Dox from loaded EV samples were calculated using the straight-line equation. Interpolation of unknown Dox was performed on GraphPad Prism 9 software.

(b) Representative Dox peaks obtained by HPLC

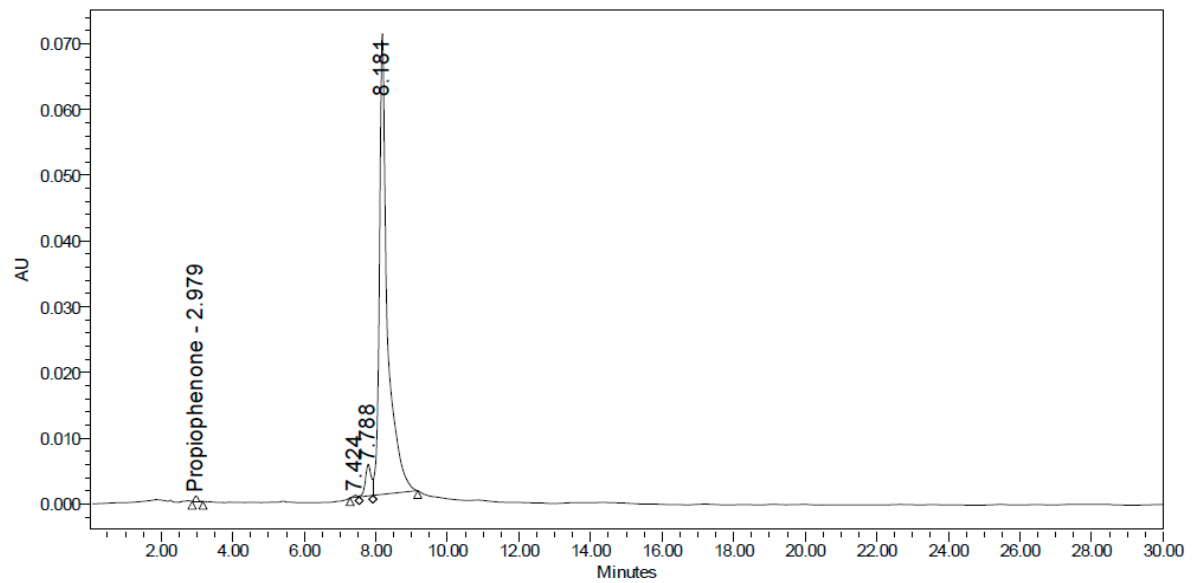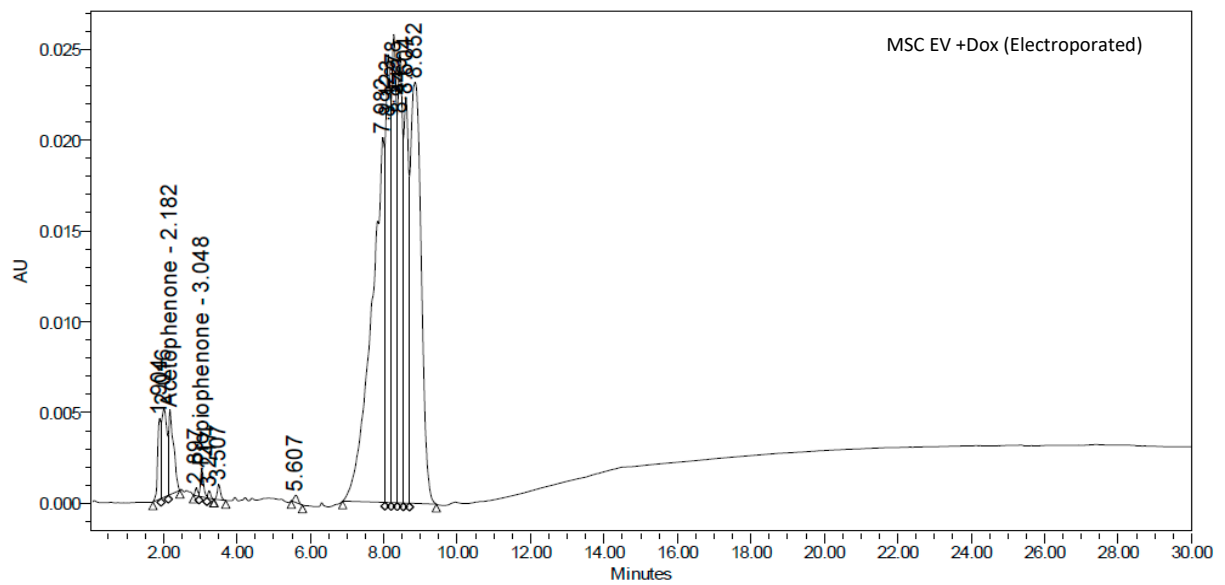

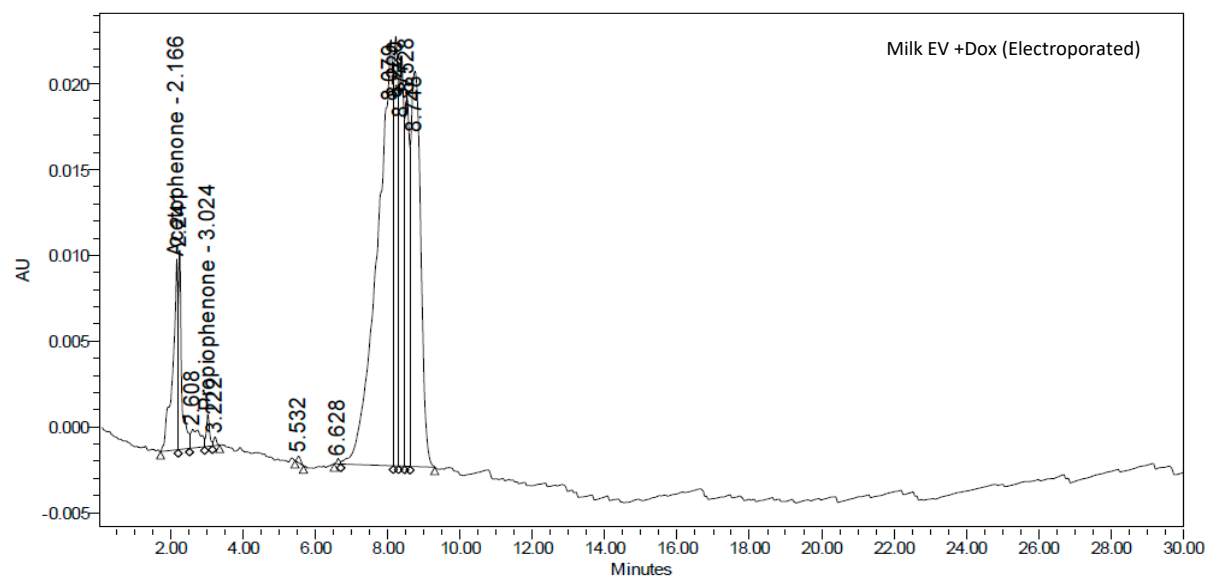

**Supp Figure S2b:** Representative doxorubicin peaks were obtained by HPLC analysis of Dox alone and Dox-loaded MSC EVs and milk EVs (lysed).
